# Supplementary material
Source: publisher site journal article supplement (https://www.dovepress.com/article/604443)
Supplement: Supplementary file 1 [file 604443%20Supplementary%20Figure%201.docx]

**Supplementary Materials**

Supplementary Figure 1.


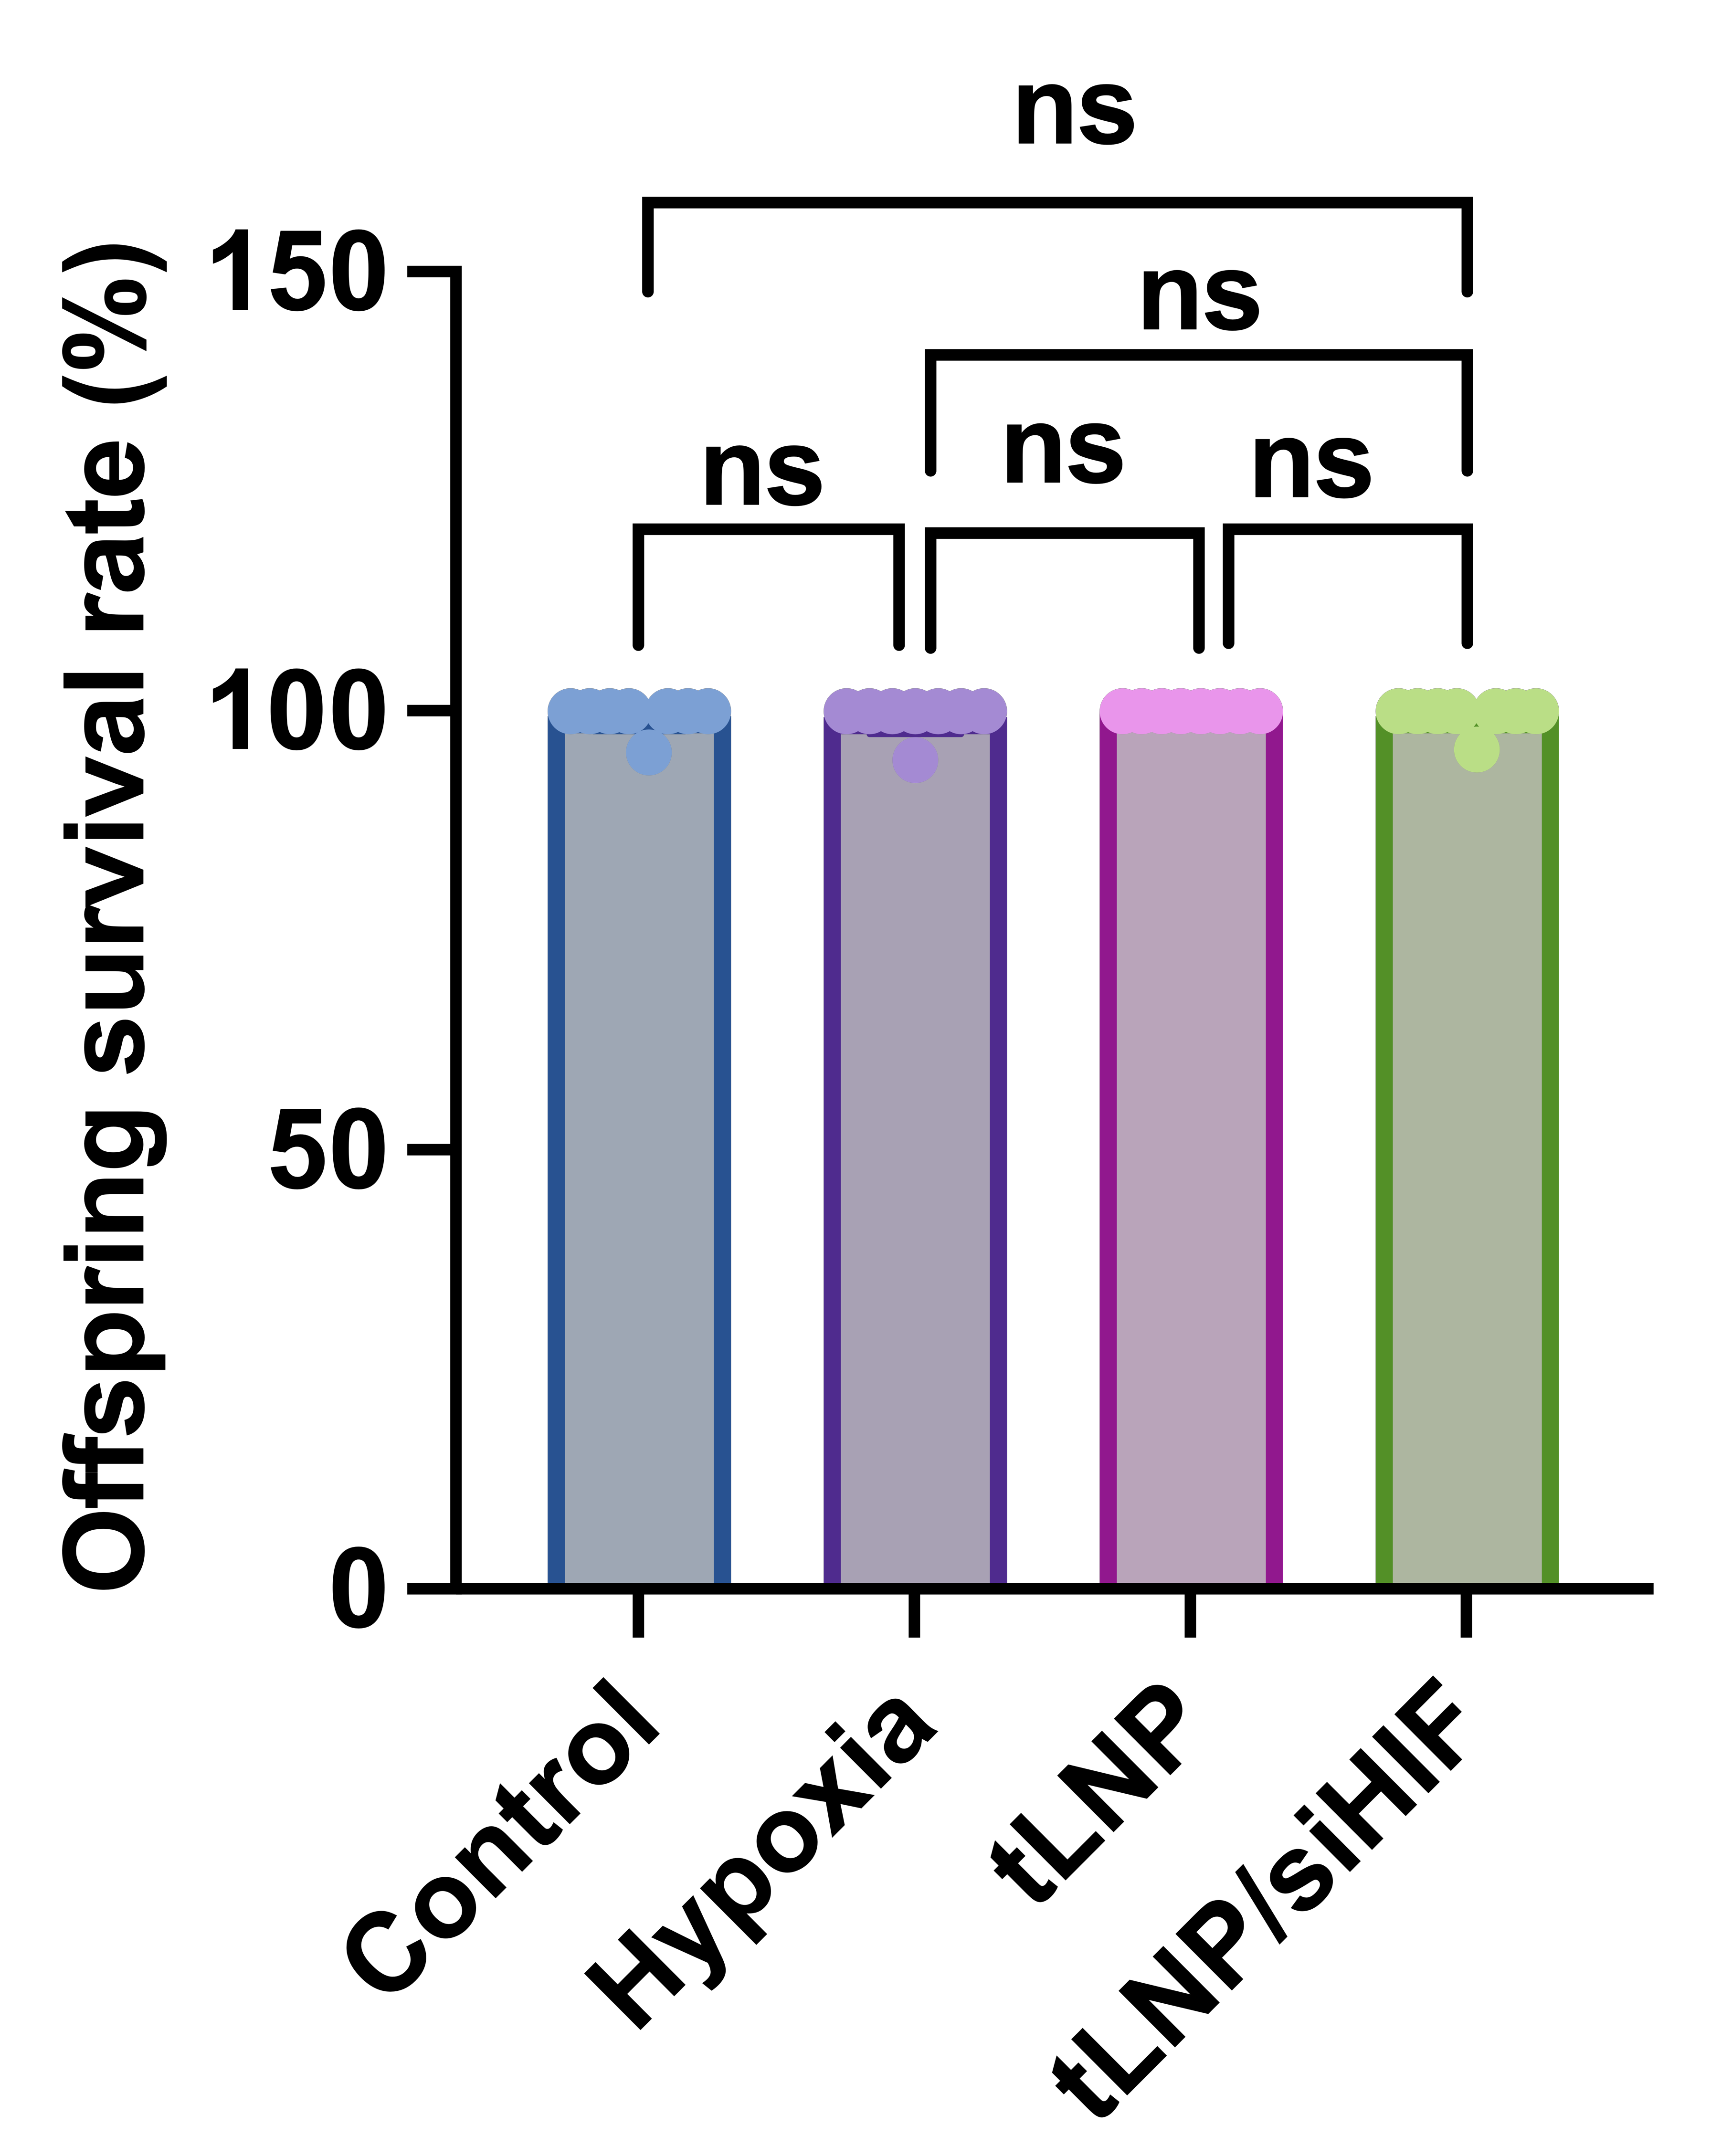


Supplementary Figure 1. Offspring survival rates across experimental groups following prenatal nanoparticle administration. Survival rate was calculated as the percentage of live pups relative to the total number of pups delivered per litter, with each litter treated as an independent biological replicate. n = 8 dams per group (Control: 8 litters, mean litter size 16.75; Hypoxia: 8 litters, mean litter size 14.75; tLNP: 8 litters, mean litter size 15.1; tLNP/siHIF: 8 litters, mean litter size 15.1). Data are presented as mean ± SEM. ns, not significant (one-way ANOVA with Tukey post hoc test).
